# Supplementary material for: Cost–benefit analysis of the mechanisms that enable migrating cells to sustain motility upon changes in matrix environments
Source: PubMed Central journal article supplement (PMC4424668; doi:10.1098/rsif.2014.1355), 2015-05-06

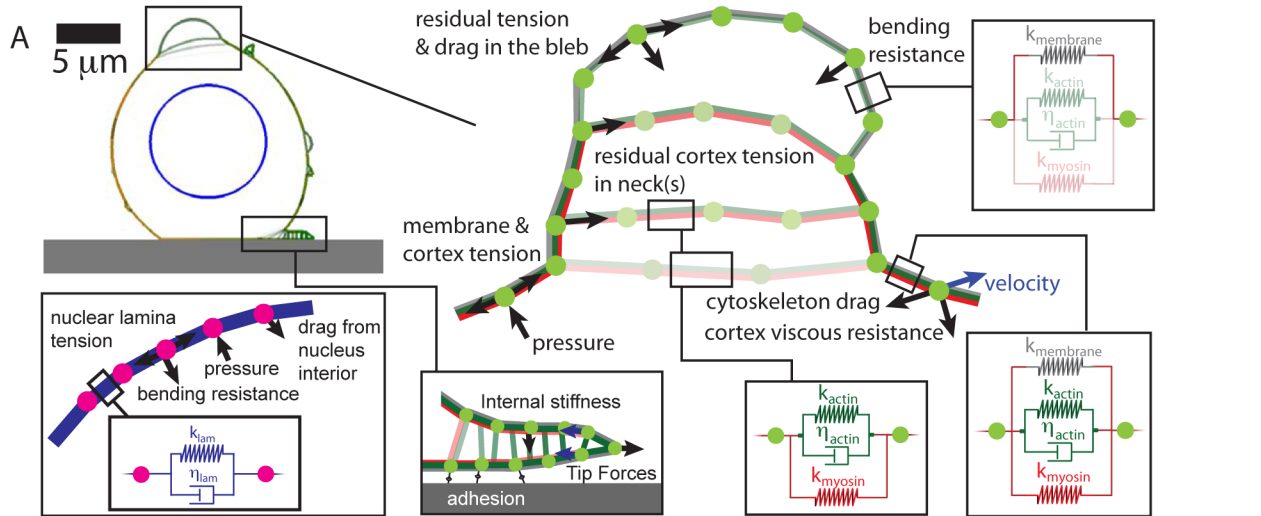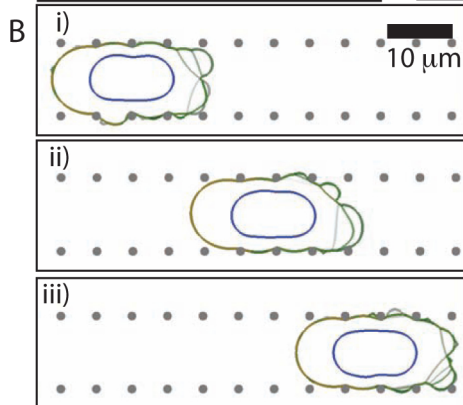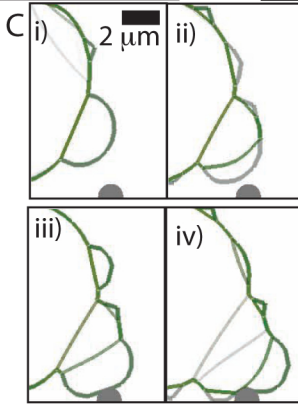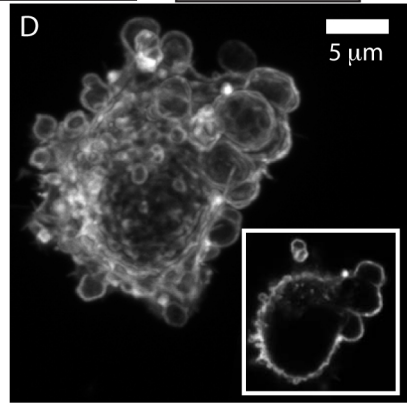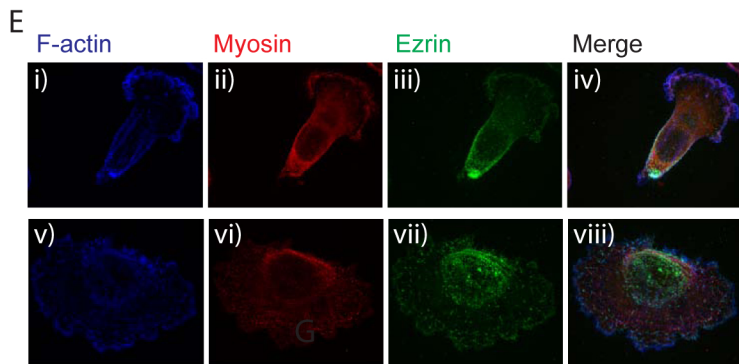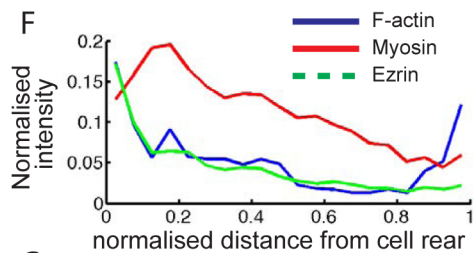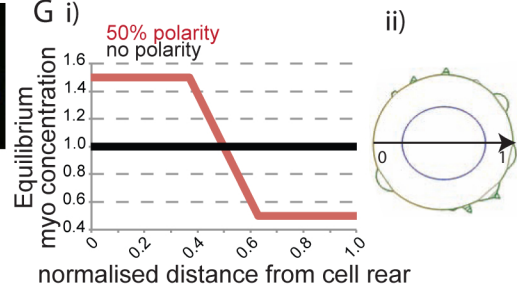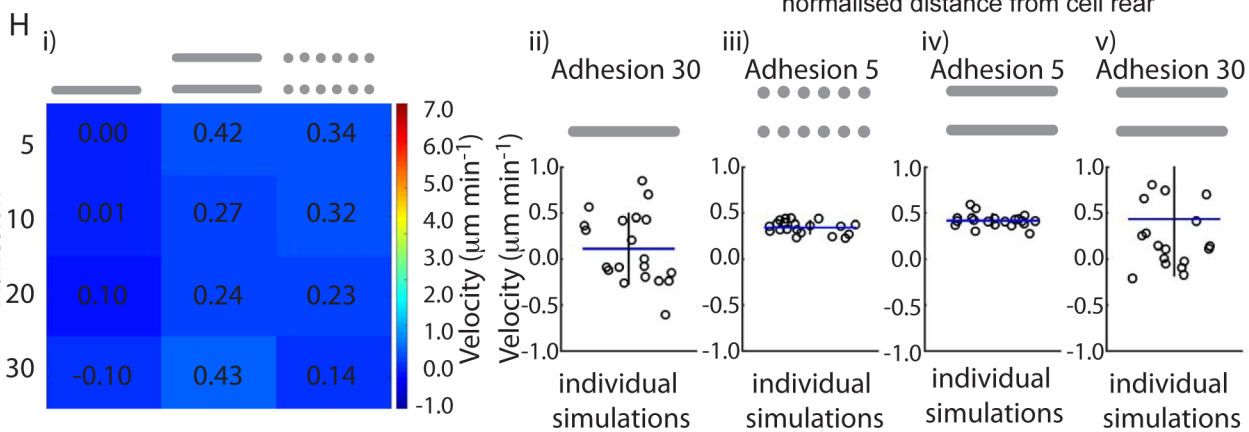

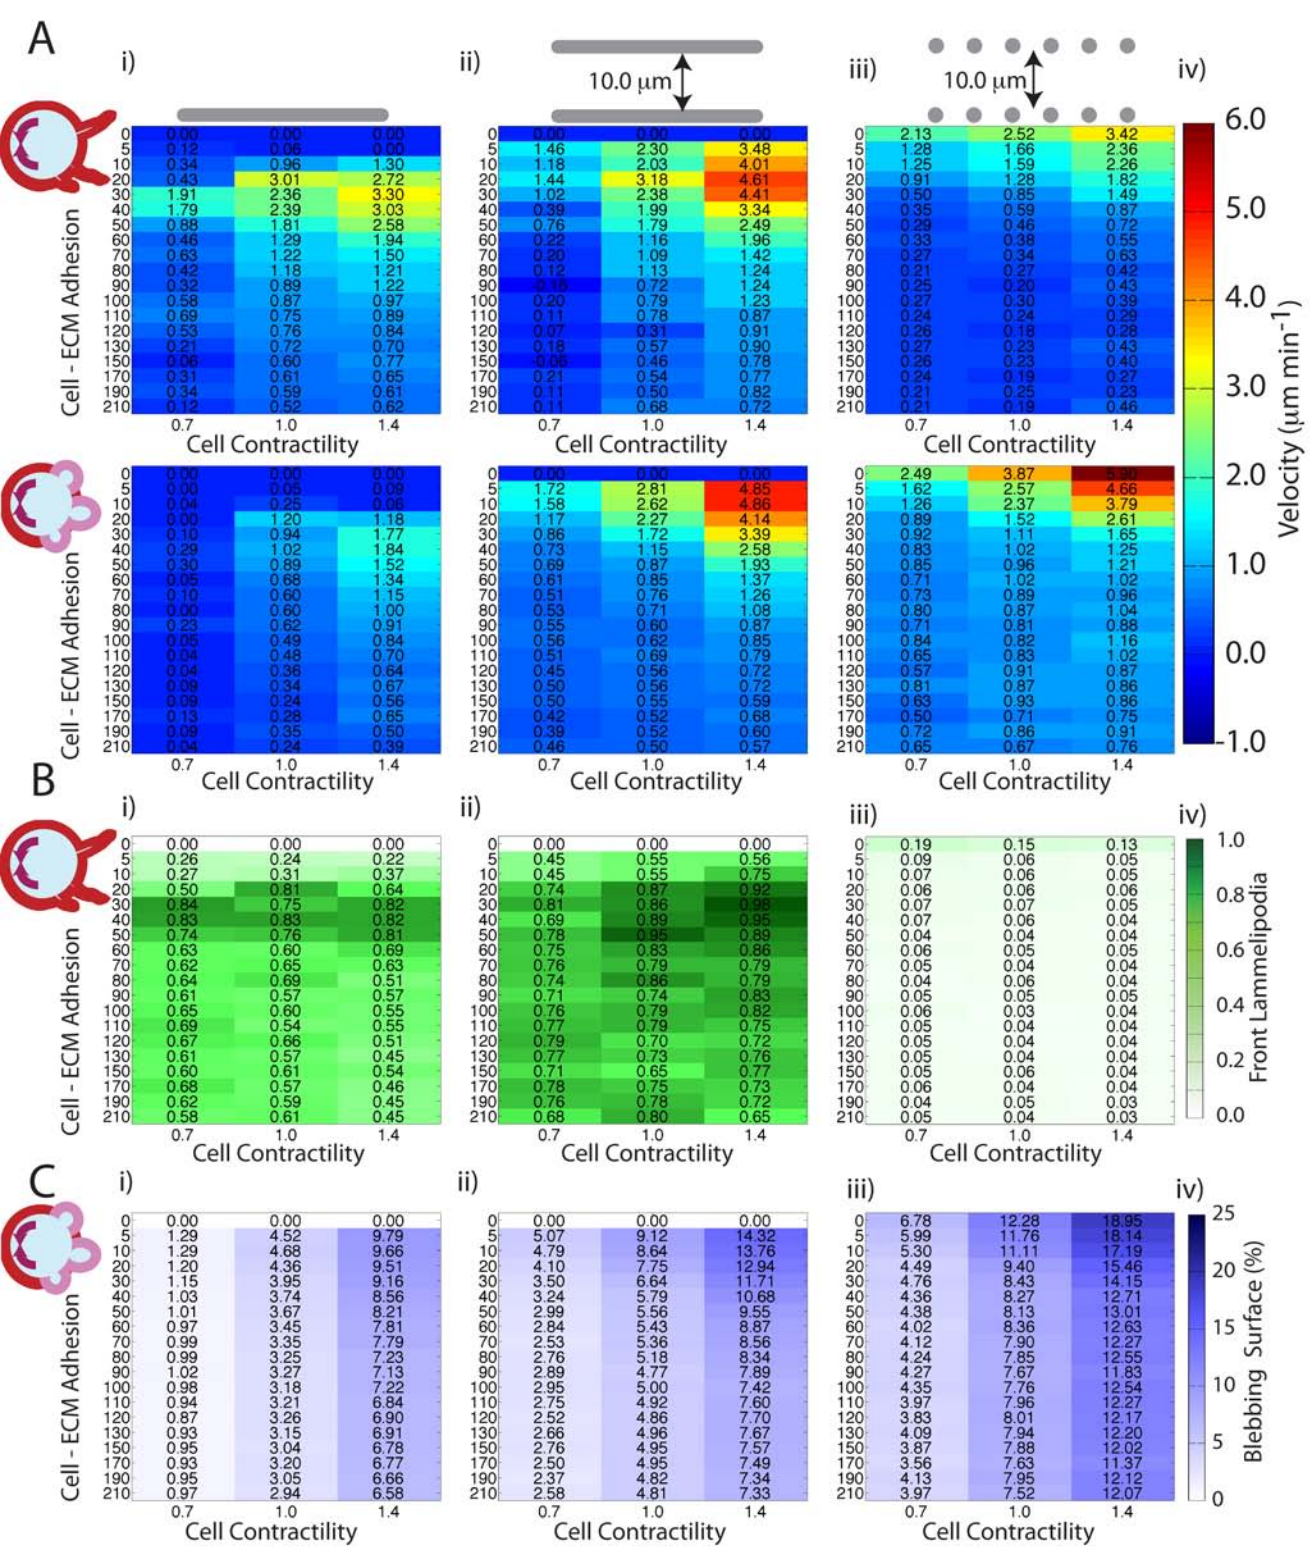



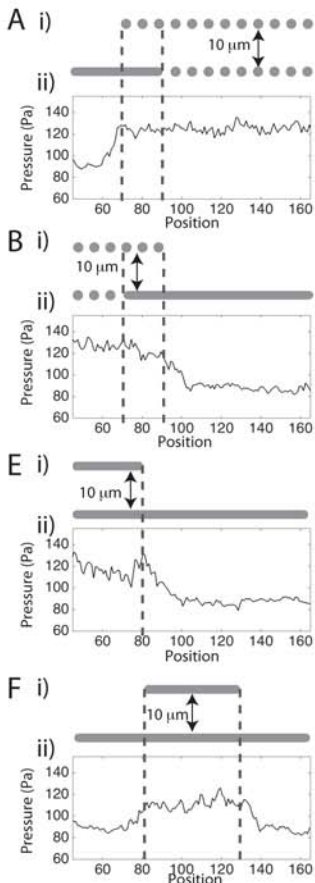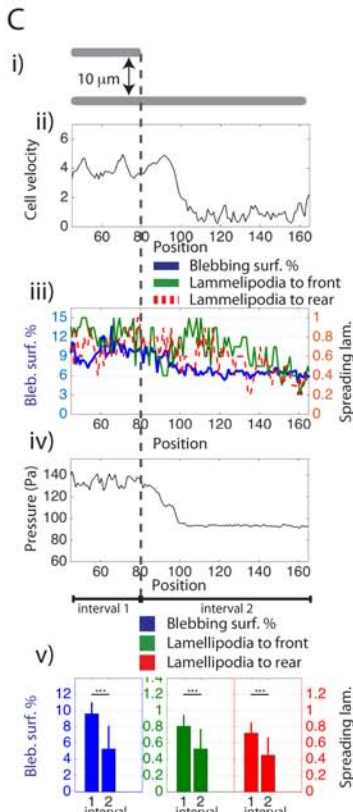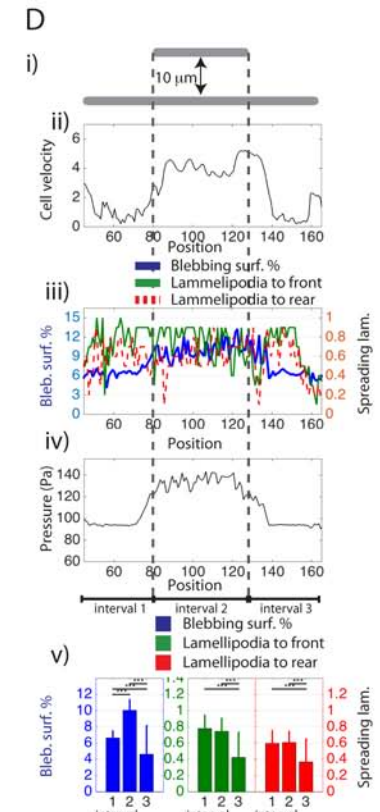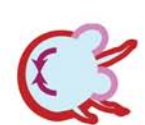

Overall Contractility = 1.0  
ERM protein level = 0.75  
Cell-ECM Adhesion = 25

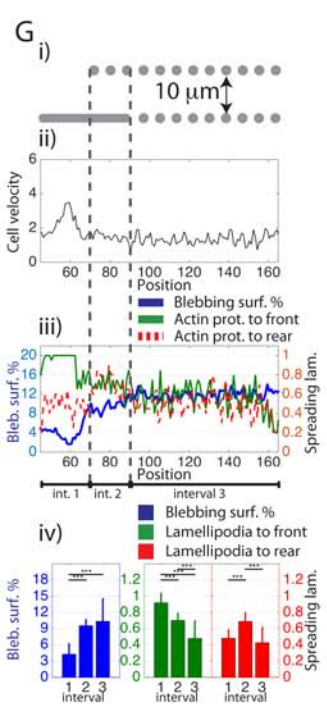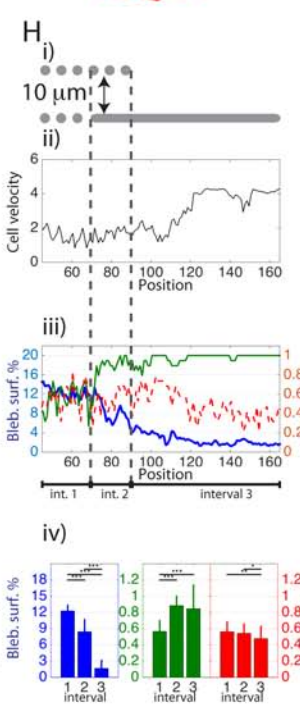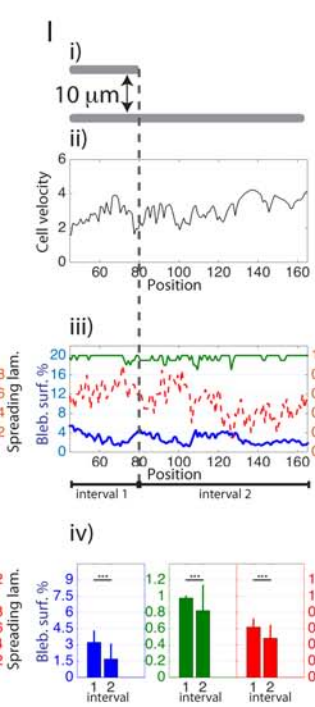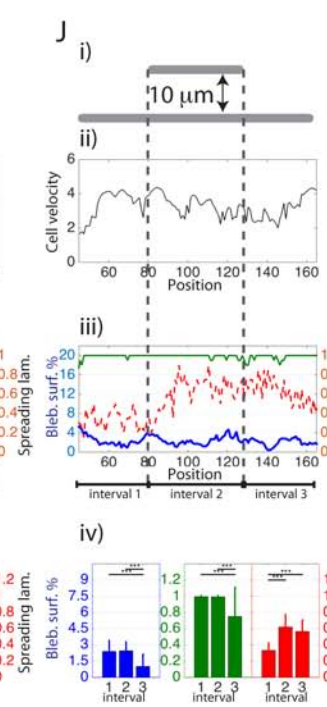

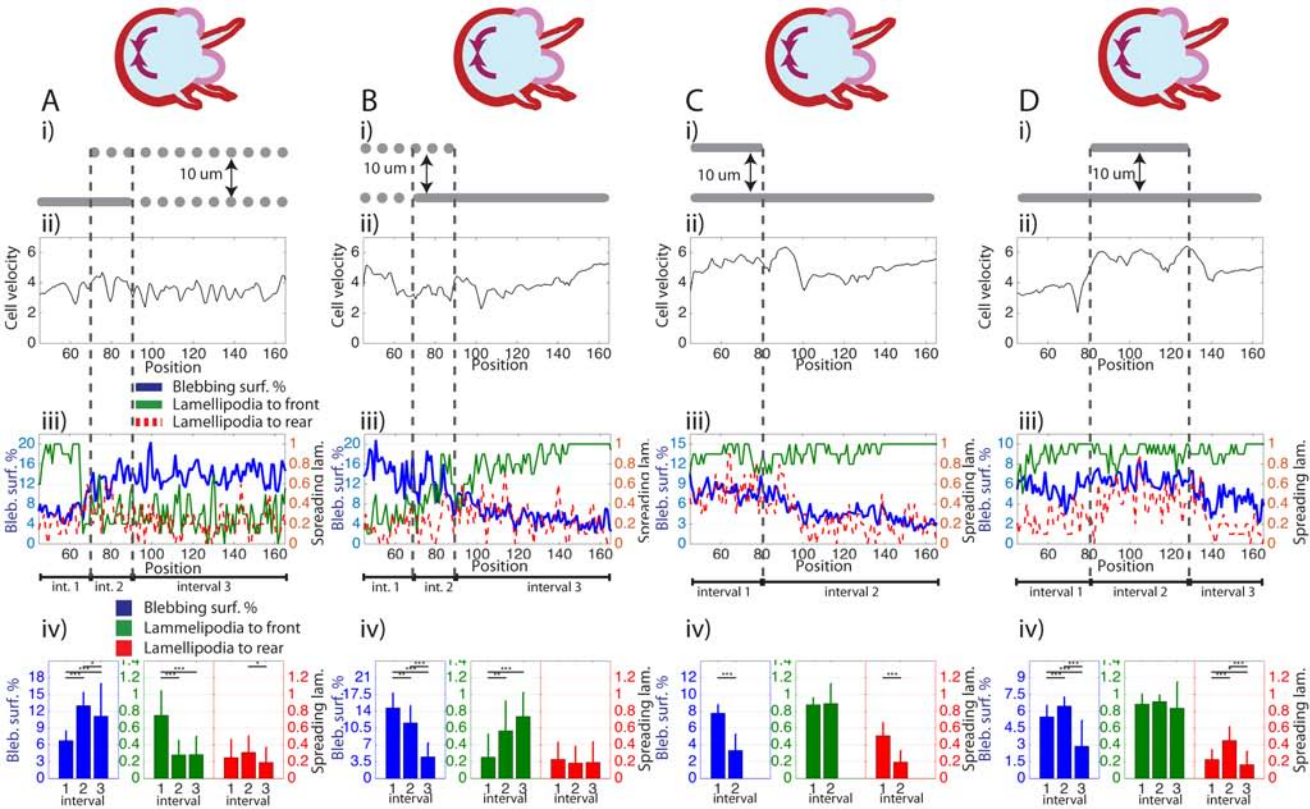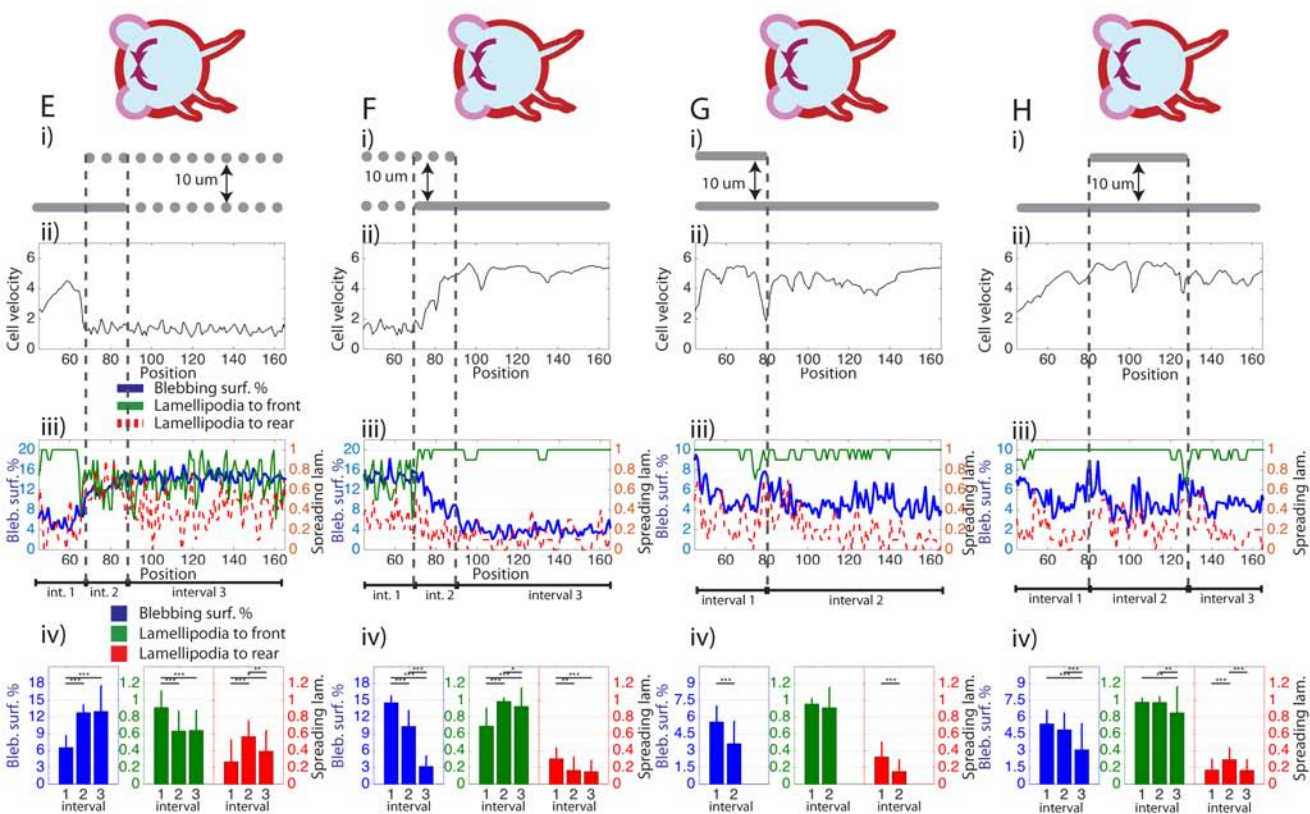



— 0.7 myo - w feedback      — 1.4 myo - w feedback  
- - - 0.7 myo - w/o feedback      - - - 1.4 myo - w/o feedback

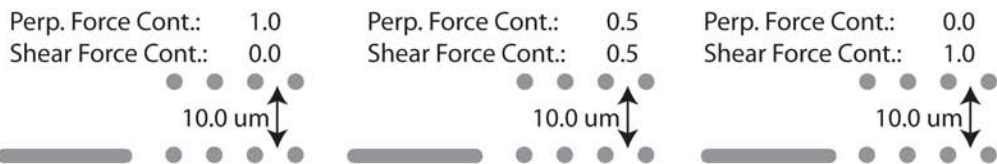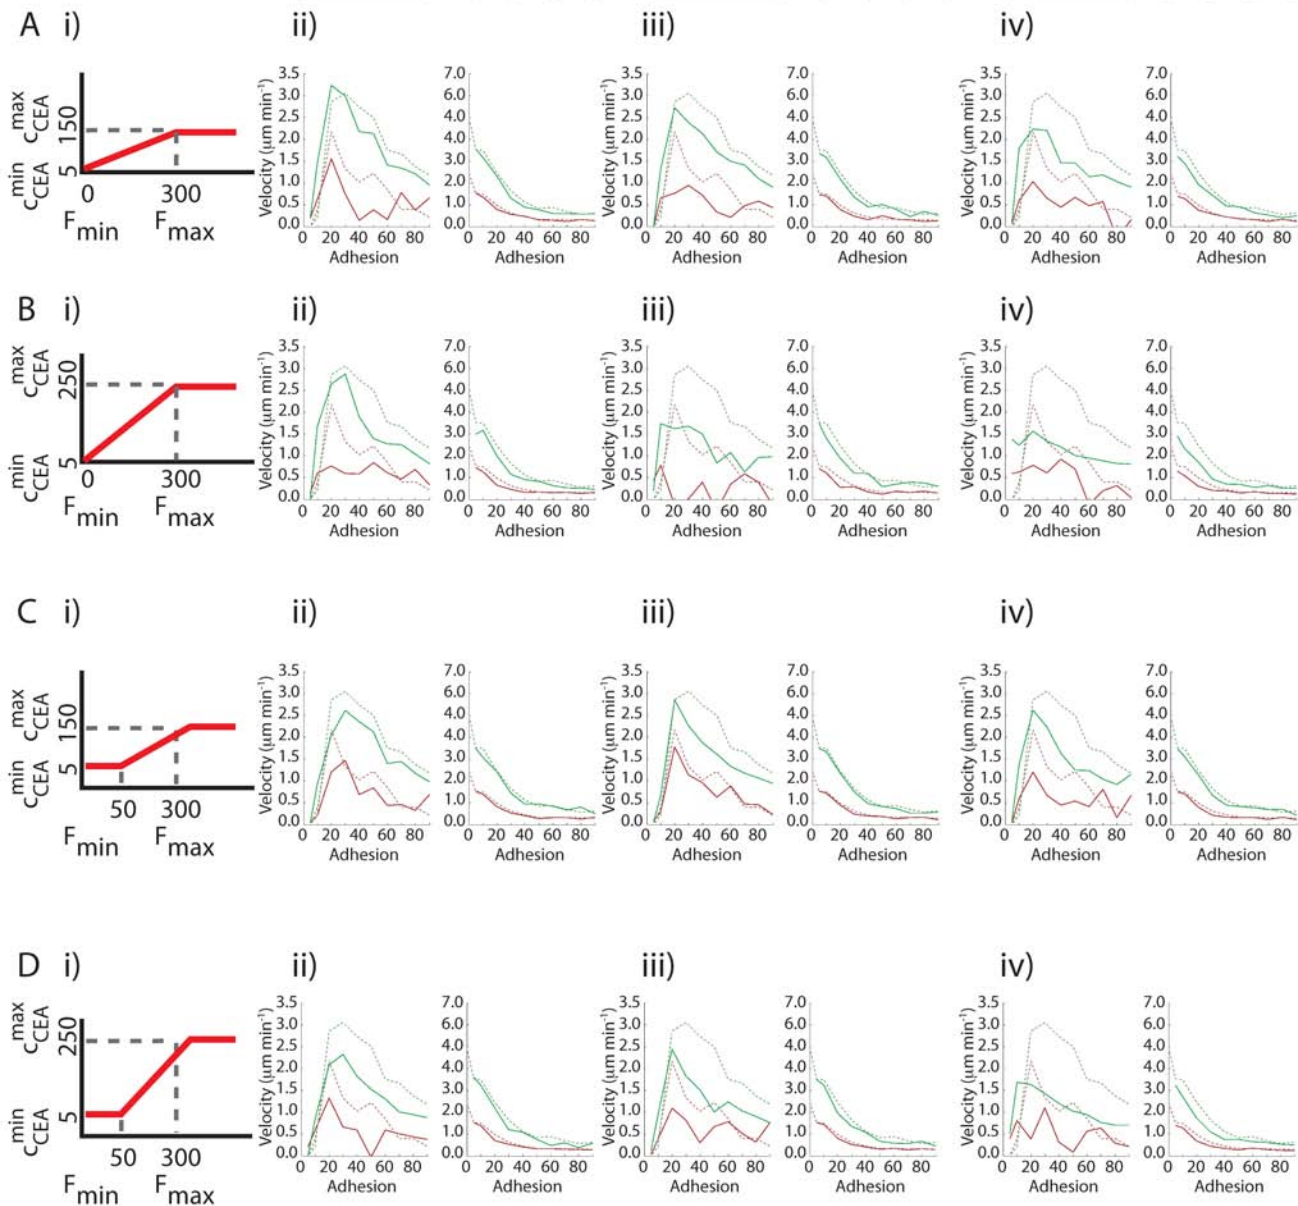

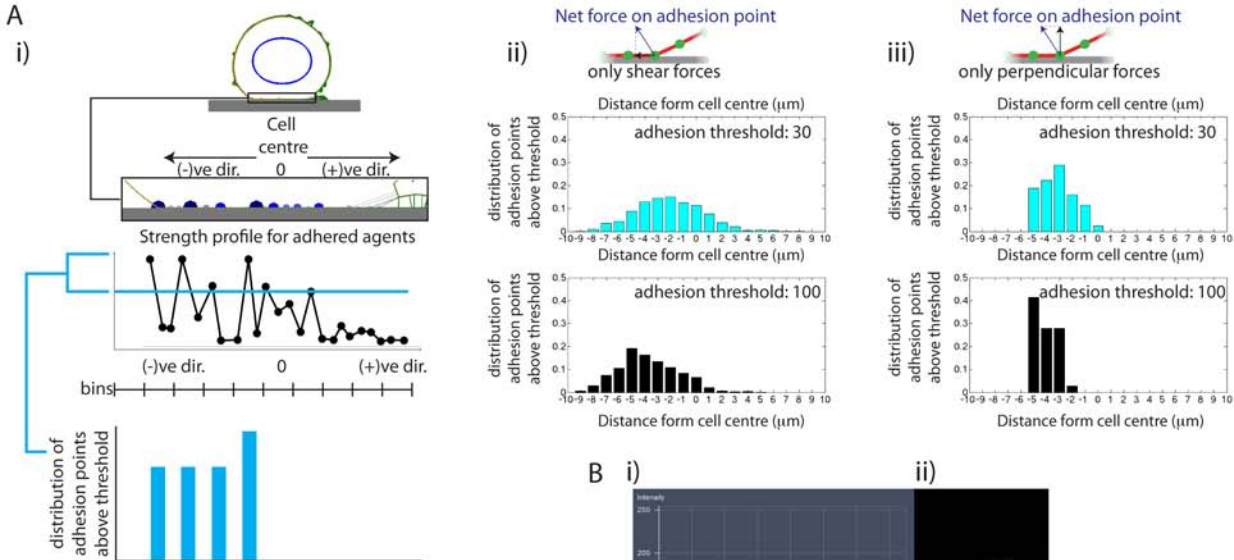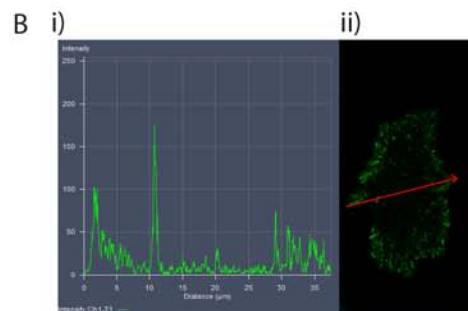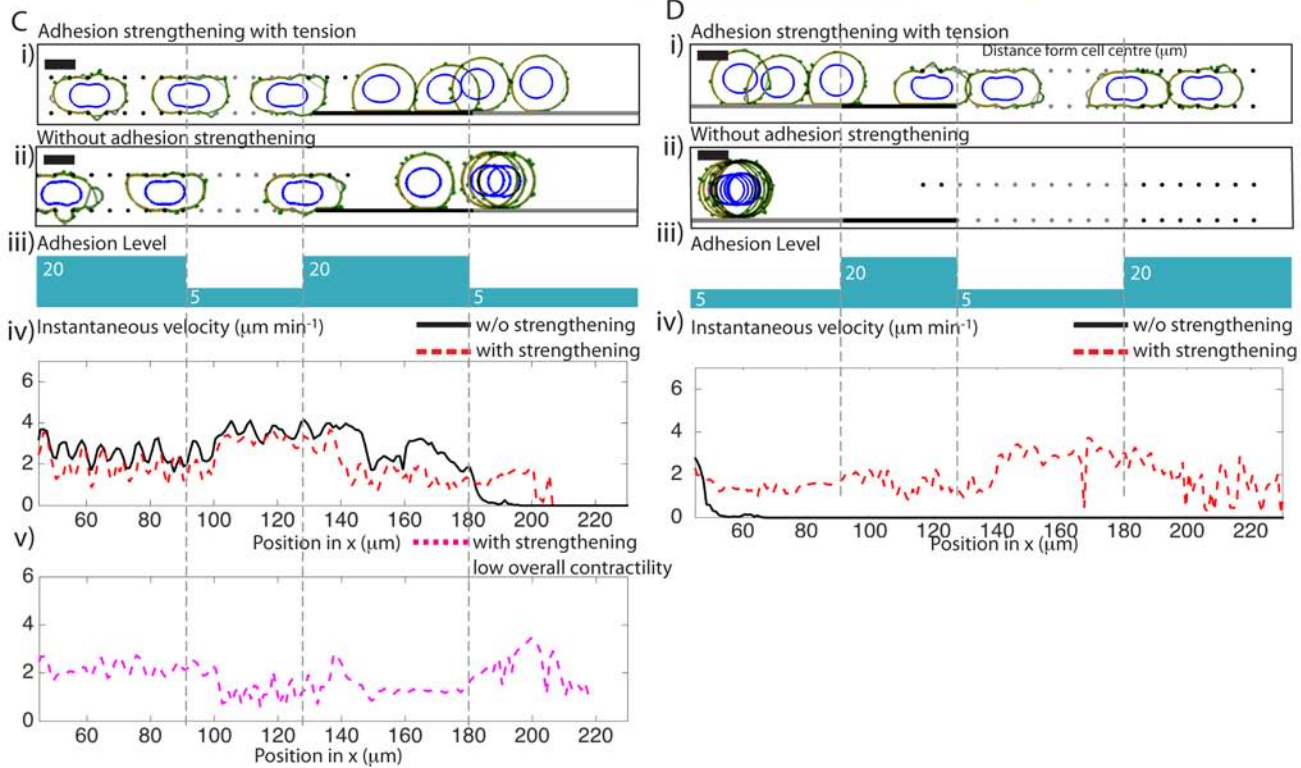

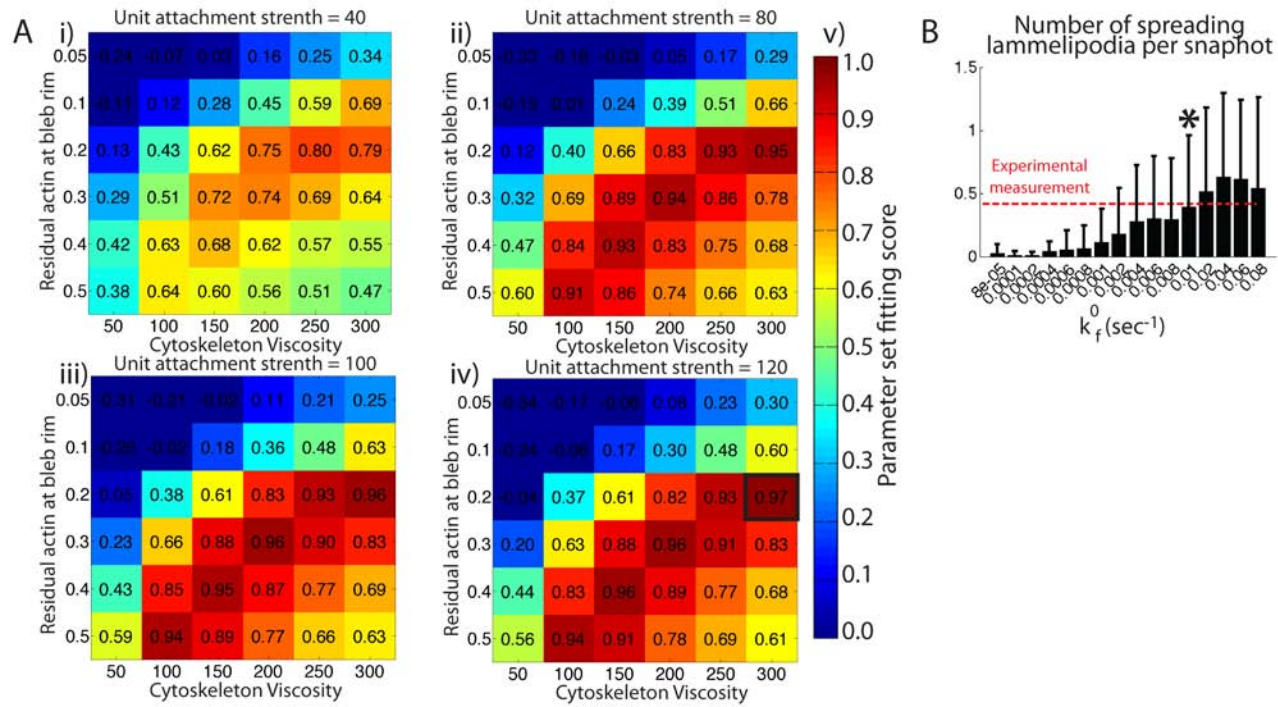

Supplement: rsif20141355supp2.pdf [file rsif20141355supp2.pdf]
